# Supplementary material for: The role of atmospheric conditions in the nonradiative recombination in individual CH3NH3PbI3 perovskite crystals
Source: Royal Society of Chemistry journal article supplement (doi:10.1039/d2na00541g), 2022-01-01
Supplement: d2na00541g1.pdf [file d2na00541g1.pdf]

## Electronic Supplementary Information

for

### **The role of atmospheric conditions in the nonradiative recombination in individual $\text{CH}_3\text{NH}_3\text{PbI}_3$ perovskite crystals**

Ruiyun Chen,<sup>\*a,b</sup> Wenling Guan,<sup>a,b</sup> Wenjin Zhou,<sup>a,b</sup> Zixin Wang,<sup>a,b</sup> Guofeng Zhang,<sup>a,b</sup> Chengbing Qin,<sup>a,b</sup> Jianyong Hu,<sup>a,b</sup> Liantuan Xiao<sup>\*a,b</sup> and Suotang Jia<sup>a,b</sup>

---

<sup>a</sup> State Key Laboratory of Quantum Optics and Quantum Optics Devices, Institute of Laser Spectroscopy, Shanxi University, Taiyuan, Shanxi 030006, China.

<sup>b</sup> Collaborative Innovation Center of Extreme Optics, Shanxi University, Taiyuan, Shanxi 030006, China

\*E-mail: chenry@sxu.edu.cn, xlt@sxu.edu.cn

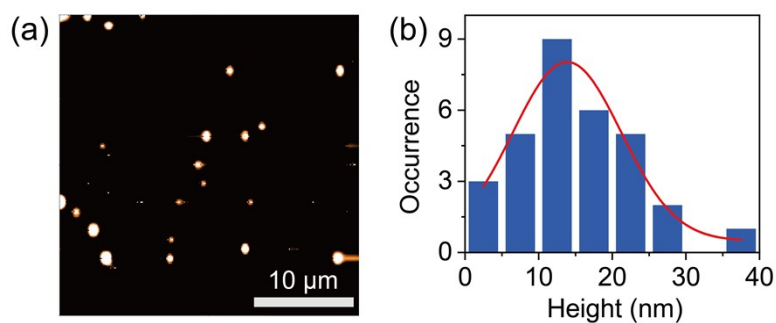

**Fig. S1** (a) AFM image of randomly distributed individual MAPbI<sub>3</sub> crystals. (b) Histogram of the height extracted from AFM image.

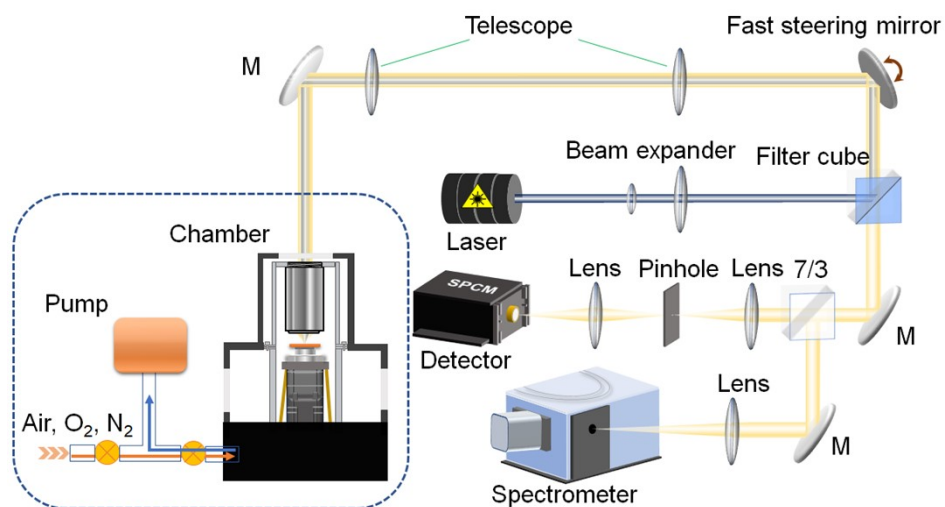

**Fig. S2** Schematic view of the experimental setup. A pulsed laser of 485 nm with a repetition rate of 2.5 MHz was used for excitation. The laser passed through an excitation filter, a dichroic mirror and focused by an objective lens onto the sample mounted inside a chamber. The excitation spot was controlled through a fast steering mirror and a telescope. The PL from the sample was collected by the same objective and detected by a single photon detector. The PL lifetime of an individual crystal was got through a time-correlated single-photon counting module. The spectrum of the perovskite crystals was achieved on a spectrometer by separating 70% of the PL.

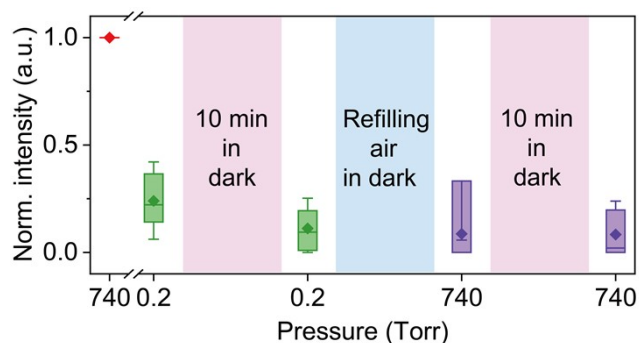

**Fig. S3** Statistics of the PL response of individual MAPbI<sub>3</sub> crystals upon exposure to ambient air, vacuum, and refilled ambient air. The evolution of the PL was measured after keeping the crystals in dark for 10 min at 0.2 Torr (vacuum) and 740 Torr (refilled air), respectively.

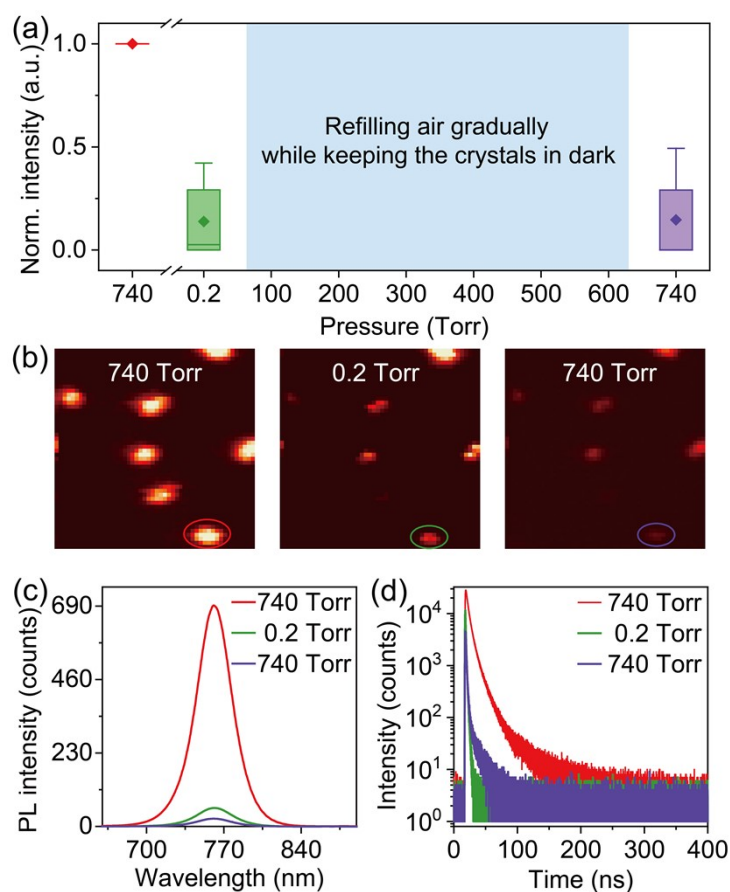

**Fig. S4** (a) PL response of individual MAPbI<sub>3</sub> crystals upon exposure to air, vacuum and refilled air. The evolution of the PL of individual perovskite crystals upon vacuum-air exchange was investigated by increasing the pressure stepwise from 0.2 Torr to 740 Torr in dark and measuring the PL when the atmospheric pressure is reached. (b) Typical PL imaging of individual crystal in different conditions. (c) Corresponding PL spectra of the same crystal as shown in (b). (d) PL decay dynamics of the crystal.

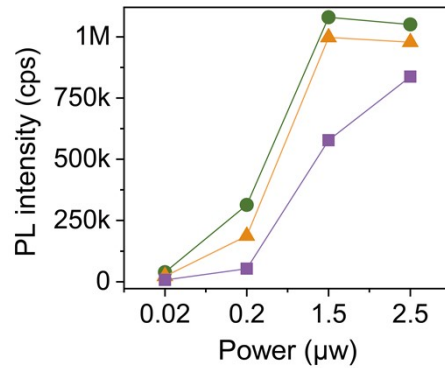

**Fig. S5** Excitation power dependence of the PL intensity from individual MAPbI<sub>3</sub> crystals.

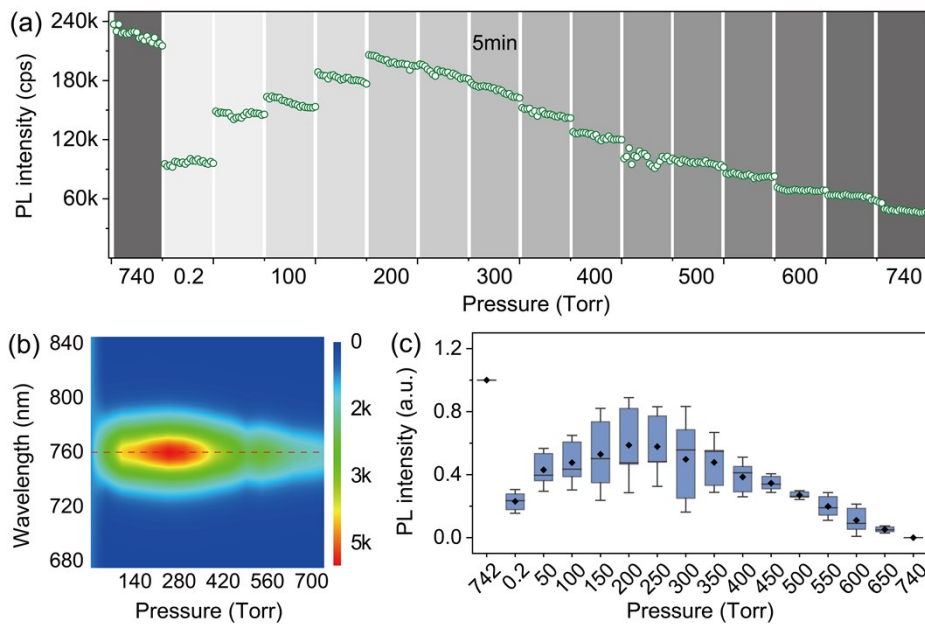

**Fig. S6** (a) Evolution of the PL intensity of an individual MAPbI<sub>3</sub> crystal upon air-vacuum-air exchange, where the PL is measured for 5 min for each air pressure. (b) Evolution of the PL spectrum of the same MAPbI<sub>3</sub> crystal as (a) during air refilling. (c) Averaged PL of an ensemble of individual MAPbI<sub>3</sub> crystals as a function of air pressure.
